# Supplementary material for: A photoswitchable diarylethene heterodimer for use as a multifunctional logic gate
Source: Royal Society of Chemistry journal article supplement (doi:10.1039/c6ra06301b), 2016-01-01
Supplement: c6ra06301b1.pdf [file c6ra06301b1.pdf]

Electronic Supplementary Information (ESI)

A Photoswitchable Diarylethene Heterodimer for Use as a  
Multifunctional Logic Gate

Qi Ai, Kwang-Hyun Ahn \*

Department of Applied Chemistry, Kyung Hee University, Yongin 446-701, Republic  
of Korea

E-mail: khahn@khu.ac.kr;

Fax: 82-31-202-7337; Tel: 82-31-201-2447

# Supporting Information

## Table of Contents:

### Part A: Experimental Section

|                                                   |    |
|---------------------------------------------------|----|
| 1. BTF-BTH function as OR gate -----              | S2 |
| 2. BTF-BTH function as INHIBIT, and AND gate----- | S2 |
| 3. Detailed information on inputs -----           | S3 |
| 4. Synthesis -----                                | S4 |

Part B:  $^1\text{H}$ -NMR spectrum,  $^{13}\text{C}$  NMR spectrum, HRMS spectrum.

## 1. BTF-BTH functions as OR gate

Table S1. Truth Tables for OR gate

| inputs   |          | output            |
|----------|----------|-------------------|
| <i>a</i> | <i>b</i> | OR gate           |
| (312nm)  | (378nm)  | ( <i>A</i> 542nm) |
| 0        | 0        | 0                 |
| 1        | 0        | 1                 |
| 0        | 1        | 1                 |
| 1        | 1        | 1                 |

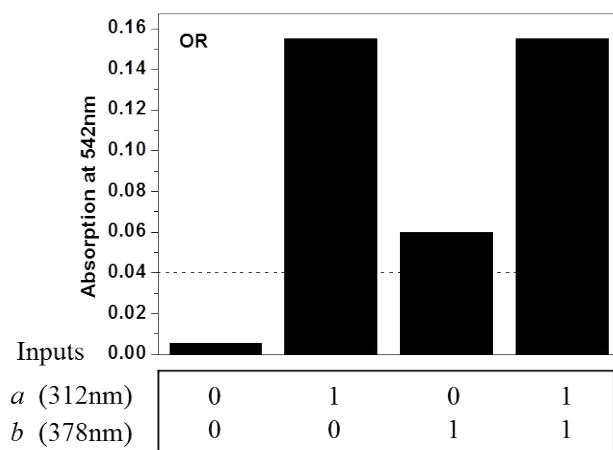

Figure S1. Performance of **BTF-BTH** as the OR gate. The input combinations (0 =off, 1 = on) for the gate are shown at the bottom of the figure. The each bar shows the output in response to Input. The threshold (dashed line) was set arbitrary to demonstrate the gate.

## 2. BTF-BTH functions as INHIBIT, and AND gate

Table S2. Truth Tables for INH and AND gate

| inputs   |                     | outputs           |            |
|----------|---------------------|-------------------|------------|
| <i>a</i> | <i>b</i>            | INH gate          | AND gate   |
| (312nm)  | (Cu <sup>2+</sup> ) | ( <i>A</i> 542nm) | (Em 492nm) |
| 0        | 0                   | 0                 | 0          |
| 1        | 0                   | 1                 | 0          |
| 0        | 1                   | 0                 | 0          |
| 1        | 1                   | 0                 | 1          |

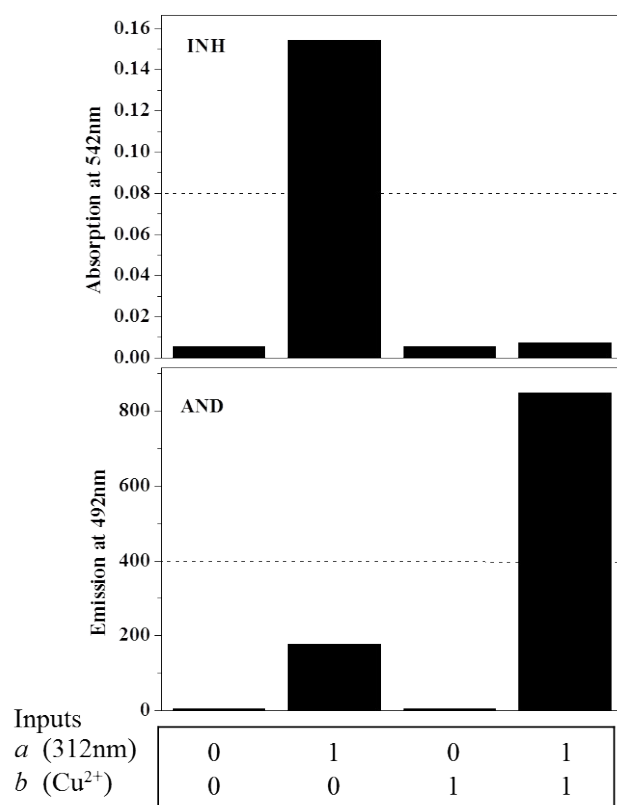

Figure S2. Performance of **BTF-BTH** as INH and AND gates. The input combinations (0 =off, 1 = on) for all gates are shown at the bottom of the figure. The each bar shows the output in response to Input. The threshold (dashed line) was assigned arbitrary to demonstrate the gate.

### 3. Detailed information on inputs

The conditions for applying inputs and measuring outputs for the various functions shown in the paper are given below.

Figure S1.

Initial state: **BTfO-BTHo**

Inputs:

Input *a*: 312 nm for 115s

Input *b*: 378nm for 1h

Output: Absorbance at 542 nm

Reset: Visible light for 600s

Figure 5.

Initial state: **BTfO-BTHo**

Inputs:

First input: 312 nm for 115 s

Second input: 540nm for 2 h

Output: Emission at 492 nm after 400 nm excitation

Reset: Visible light for 600s

Figure S2.

Initial state: **BTfO-BTHo**

Inputs:

Input *a*: 312 nm for 115s

Input *b*: Cu<sup>2+</sup> 1eq

Outputs:

INH2 gate: Absorbance at 542 nm

AND gate: Emission at 492 nm after excitation at 400 nm

Reset: Visible light for 600s

Figure 6.

Initial state: **BTfO-BTHo**

Inputs:

In: 312 nm for 115s

Ad: Cu<sup>2+</sup> 1eq

Output: Emission at 605 and 492 nm after excitation at 400 nm

Reset: Visible light for 600s

## 4. Synthesis

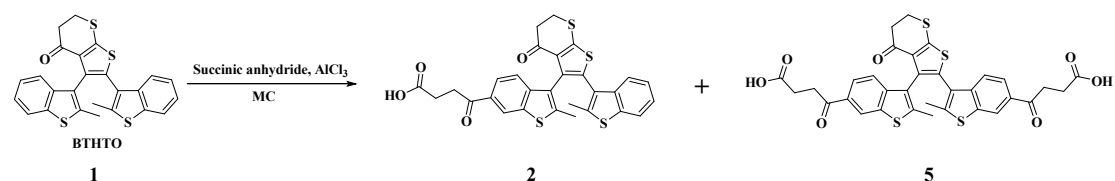

### 4,4'-(3,3'-(4-oxo-5,6-dihydro-4H-thieno[2,3-b]thiopyran-2,3-diyl)bis(2-methylbenzo[b]thiophene-6,3-diyl))bis(4-oxobutanoic acid) (5)

AlCl<sub>3</sub> (0.18 g, 1.32 mmol) was added to a solution of **BTHTO** (0.10 g, 0.22 mmol) in CH<sub>2</sub>Cl<sub>2</sub> (15 mL) at room temperature. After stirring for 5 min at room temperature, succinic anhydride (0.13 g, 1.32 mmol) was added to the reaction mixture. The solution was stirred for 4 h at room temperature, and then 1 M HCl (5 mL) was added to quench the reaction. The reaction mixture was extracted with CH<sub>2</sub>Cl<sub>2</sub>. The organic layer was washed with water followed by brine solution and dried over MgSO<sub>4</sub>. The

organic layer was filtered and concentrated to give the crude product, which was purified by column chromatography (EA) to give **2** (0.03 g, 20%) as a reddish powder;

$^1\text{H}$  NMR( $\text{CDCl}_3$ , 300MHz)  $\delta$  (ppm): 8.32 (s, 1 H), 8.22 (s, 1H), 7.93 (d,  $J$  = 9Hz, 0.66H), 7.86 (d,  $J$  = 9 Hz, 0.66H), 7.70 (t,  $J$  = 15 Hz, 1.54H), 7.52 (d,  $J$  = 9 Hz, 0.71H), 7.37-7.26 (m, 0.43H), 3.48-3.21 (m, 6H), 2.83-2.76 (m, 6H), 2.48 (s, 1.5H), 2.24 (s, 1.5H), 1.90 (d,  $J$  = 6 Hz, 3H); HRMS (FAB $^+$ ):  $m/z$  calcd for  $\text{C}_{33}\text{H}_{26}\text{O}_7\text{S}_4$   $[\text{M}+\text{H}]^+$ : 663.8361; found: 663.8382.

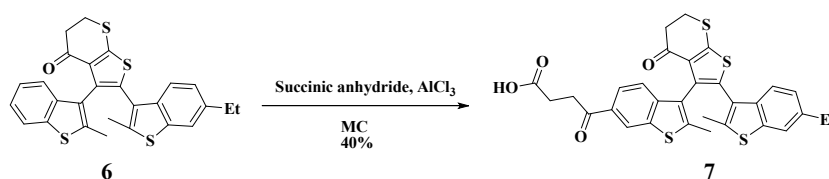

**4-(3-(2-(6-ethyl-2-methylbenzo[b]thiophen-3-yl)-4-oxo-5,6-dihydro-4H-thieno[2,3-b]thiopyran-3-yl)-2-methylbenzo[b]thiophen-6-yl)-4-oxobutanoic acid (**7**)**

$\text{AlCl}_3$  (0.11 g, 0.80 mmol) was added to a solution of **6**<sup>1</sup> (0.10 g, 0.20 mmol) in  $\text{CH}_2\text{Cl}_2$  (15 mL) at room temperature. After stirring for 5 min at room temperature, succinic anhydride (0.08 g, 0.80 mmol) was added to the reaction mixture. The solution was stirred for 4 h at room temperature, and then 1 M HCl (5 mL) was added to quench the reaction. The reaction mixture was extracted with  $\text{CH}_2\text{Cl}_2$ . The organic layer was washed with water followed by brine solution and dried over  $\text{MgSO}_4$ . The organic layer was filtered and concentrated to give the crude product, which was purified by column chromatography (Hex/EA=4:1) to give **5** (0.047 g, 40%) as a reddish powder;

$^1\text{H}$  NMR ( $\text{CDCl}_3$ , 300MHz)  $\delta$  (ppm): 8.35 and 8.25 (s $\times$ 2, 1H), 7.86 (d,  $J$  = 9 Hz, 0.58 H), 7.64-7.51 (m, 1.59H) , 7.39 (d,  $J$  = 9Hz, 0.67H), 7.26-7.18(m, 2.16H), 3.55-3.29 (m, 4H), 2.91-2.78 (m, 6H), 2.45 (s, 1H), 2.38 (s, 1H), 1.90 and 1.77 (s $\times$ 2, 4H), 1.28-1.18 (m, 3H); HRMS (FAB $^+$ ):  $m/z$  calcd for  $\text{C}_{31}\text{H}_{26}\text{O}_4\text{S}_4$   $[\text{M}+\text{H}]^+$ : 591.8159; found: 591.8171.

C:\Documents and Settings\db\바탕 화면\DATA\AI QI\AQ-50.als  
AQ-50

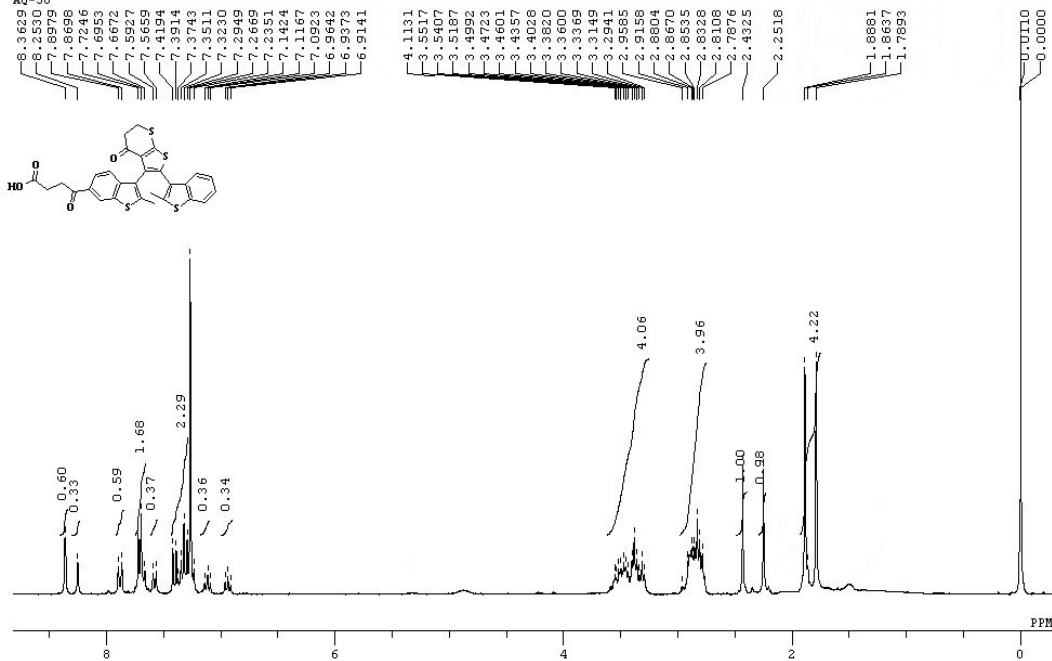

C:\WINNMR98\COMMON\\_DEFAULT.ALS  
AQ-50-13C DMSO

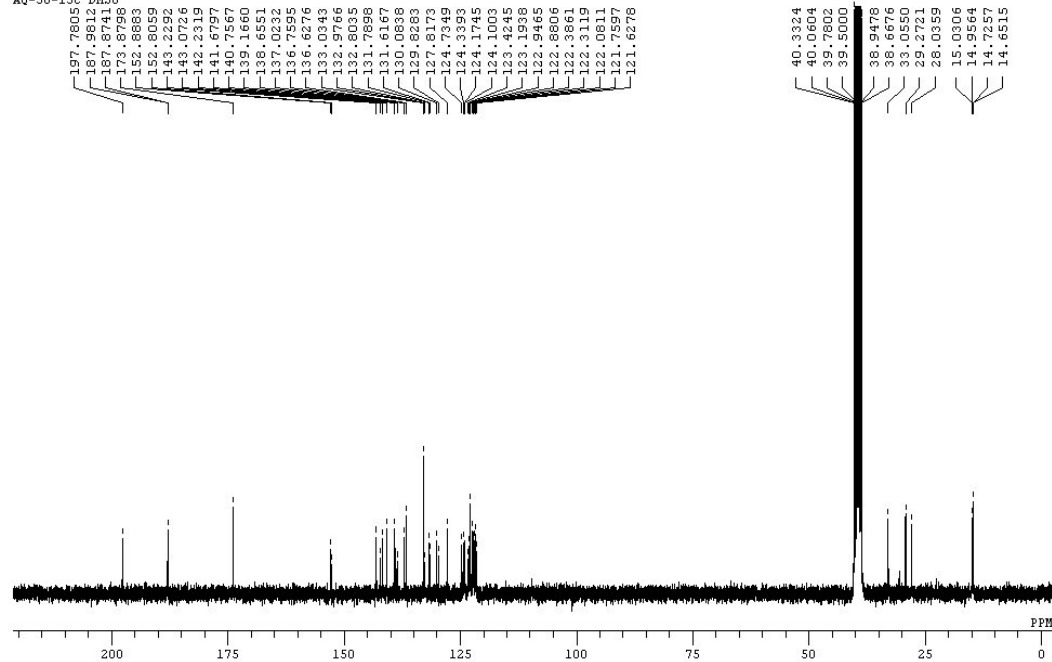

[ Mass Spectrum ]  
Data : 2011273-187-2003 Date : 21-Dec-2013 10:57  
Sample : -  
Vials : -  
Inlet : Direct Ion Mode : FID  
Spectrum Type : Normal Ion [PF-linear]  
RT : 3.30 min Scan : 120  
BP : m/z 563.0467 Int. : 510.71  
Output m/z range : 562.7491 to 563.3219 CUI Level : 2.00 X  
9545680

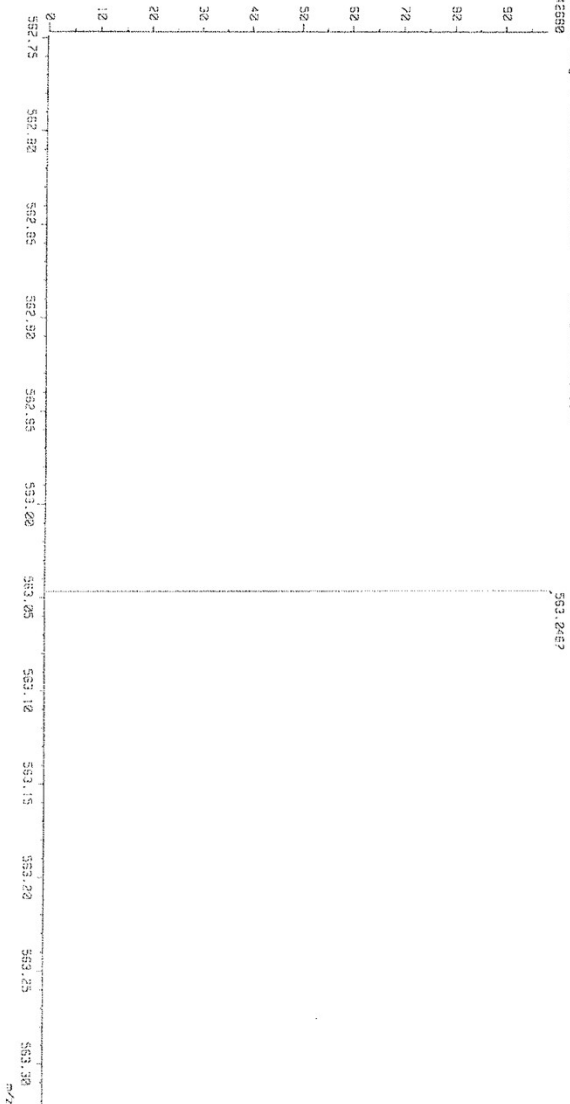

C:\Documents and Settings\hsham\바탕 화면\DATA\AI QI\H sensor paper\mono-BTF04.als

AQ-PAPER-MONO

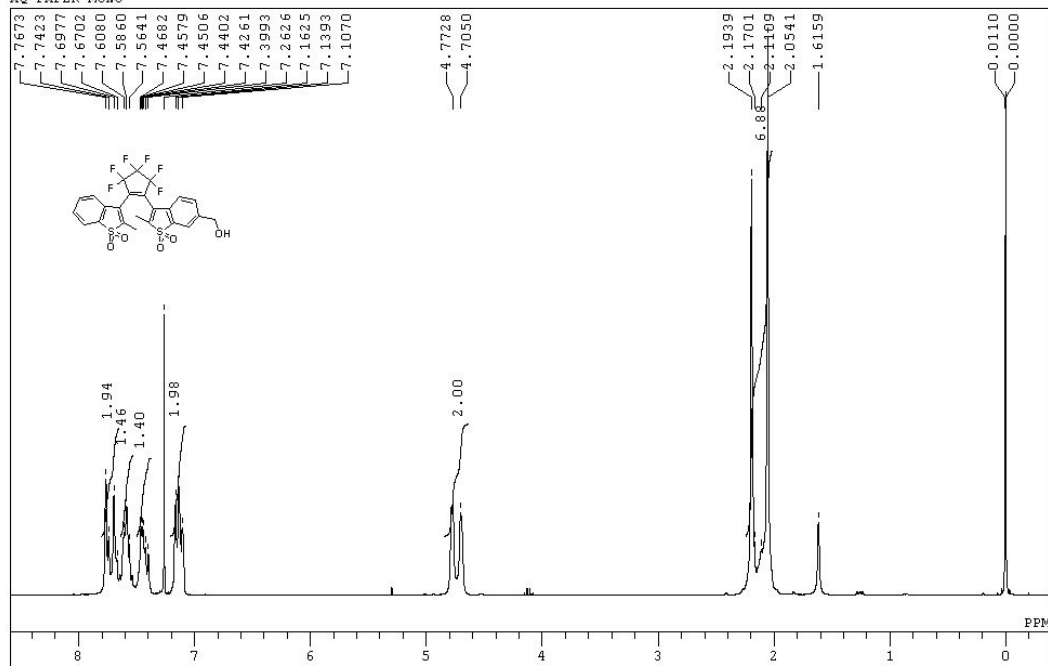

C:\Documents and Settings\hsham\바탕 화면\DATA\AI QI\H sensor paper\mono-BTF04 CNMR.als

AQ-PAPER-MONO

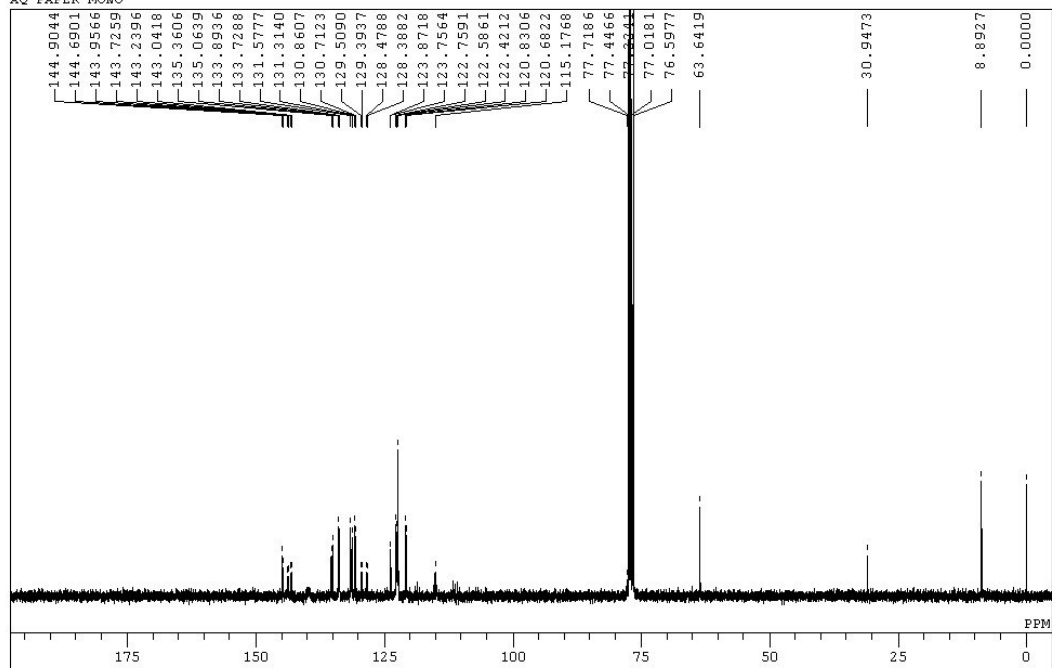

[Mass Spectrum]  
Data : 20131227-R1-024 Date : 23-Dec-2013 11:19  
Sample : -  
Note : -  
Inlet : Direct Ion Mode : FID+  
Spectrum Type : Normal Ion [SC-Linear]  
RT : 0.10 min Scan# : 4  
BP : m/z 345.2644 Int. : 1559.30  
Output m/z range : 552.5611 to 553.4180 Cut Level : 0.002 x  
455831

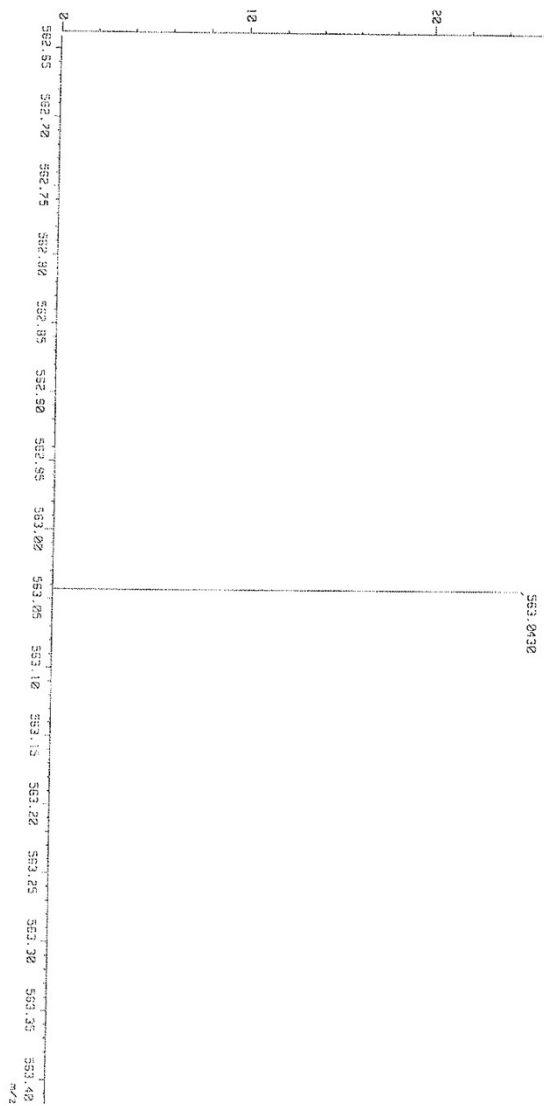

AQ-143

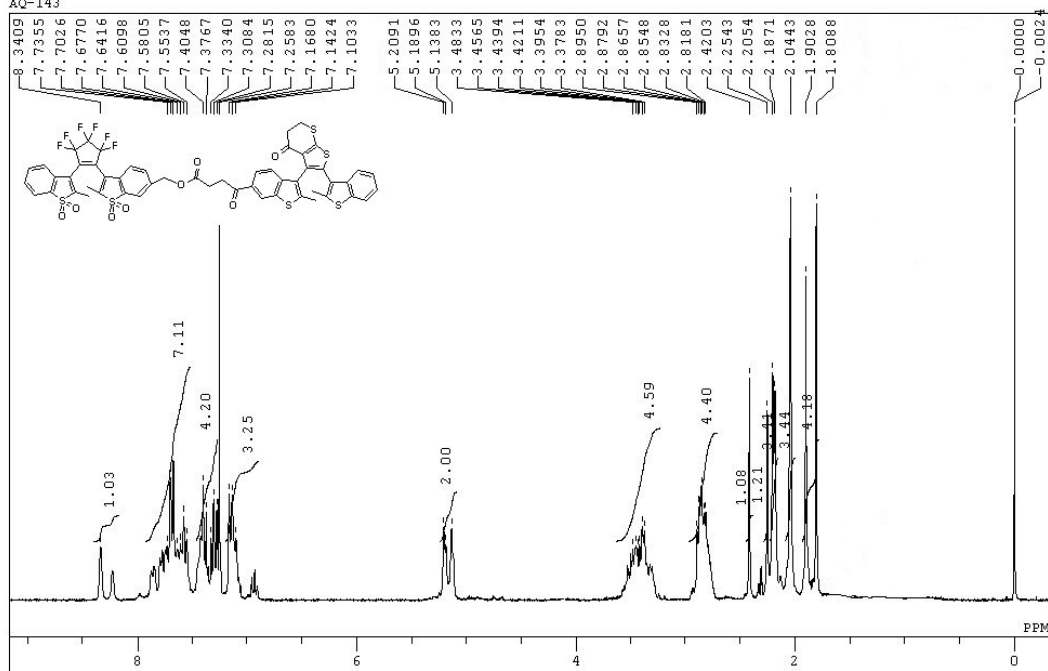

AQ-113

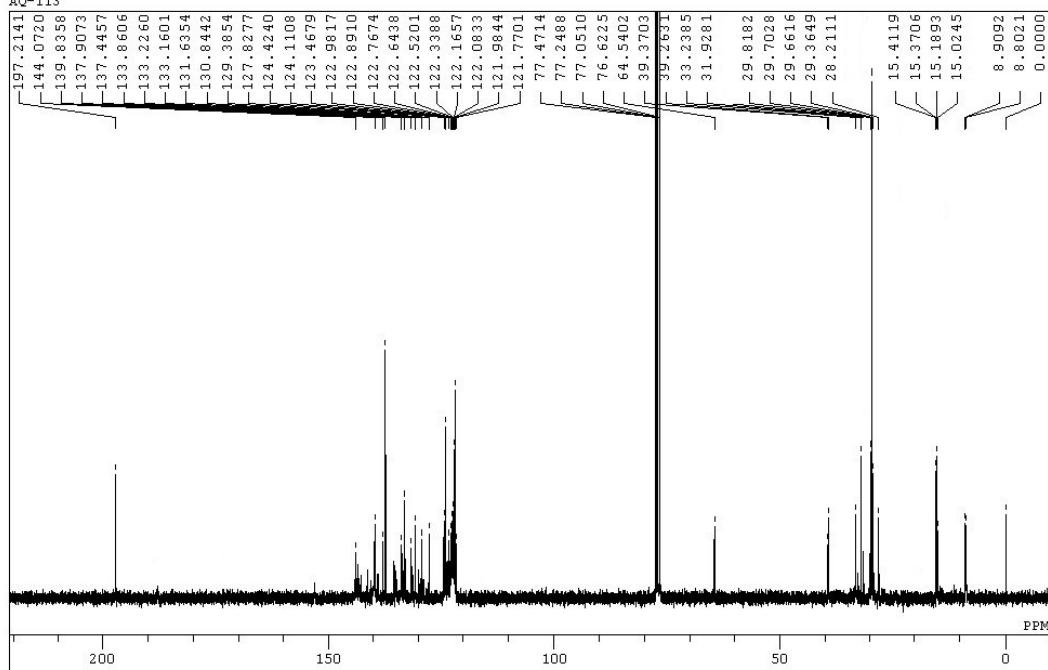

[Mass Spectrum]  
Date: 20131213-HR-3-201 Time: 21-Dec-2013 12:25  
Sample: -  
Note: -  
Event: Direct Ion Mode: FIB+  
ScanType: Normal Ion (W-Liquid)  
RT: 1.722min Scan: 5245  
BP: m/z 102.0721 Int: 29.85  
Current m/z range: 1105.7235 to 1107.3531 Cut Low: 0.00 %  
E4398B

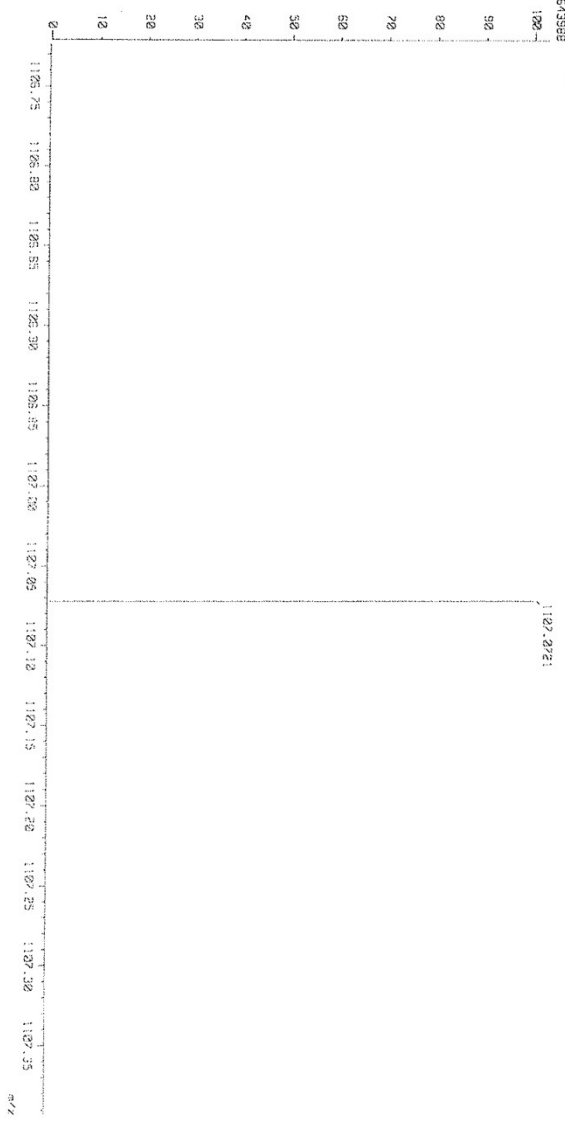

## References

1. Q. Ai, S. Pang and K.-H. Ahn, *Chem. –Eur. J.*, 2015, DOI: 10.1002/chem.201504131, n/a-n/a.
